# Supplementary material
Source: Springer Nature journal article supplement (https://www.springermedizin.de/resource/supplementary/12961_2013_287_MOESM4_ESM.pdf/9570966)
Supplement: MOESM4 [file 9570966]

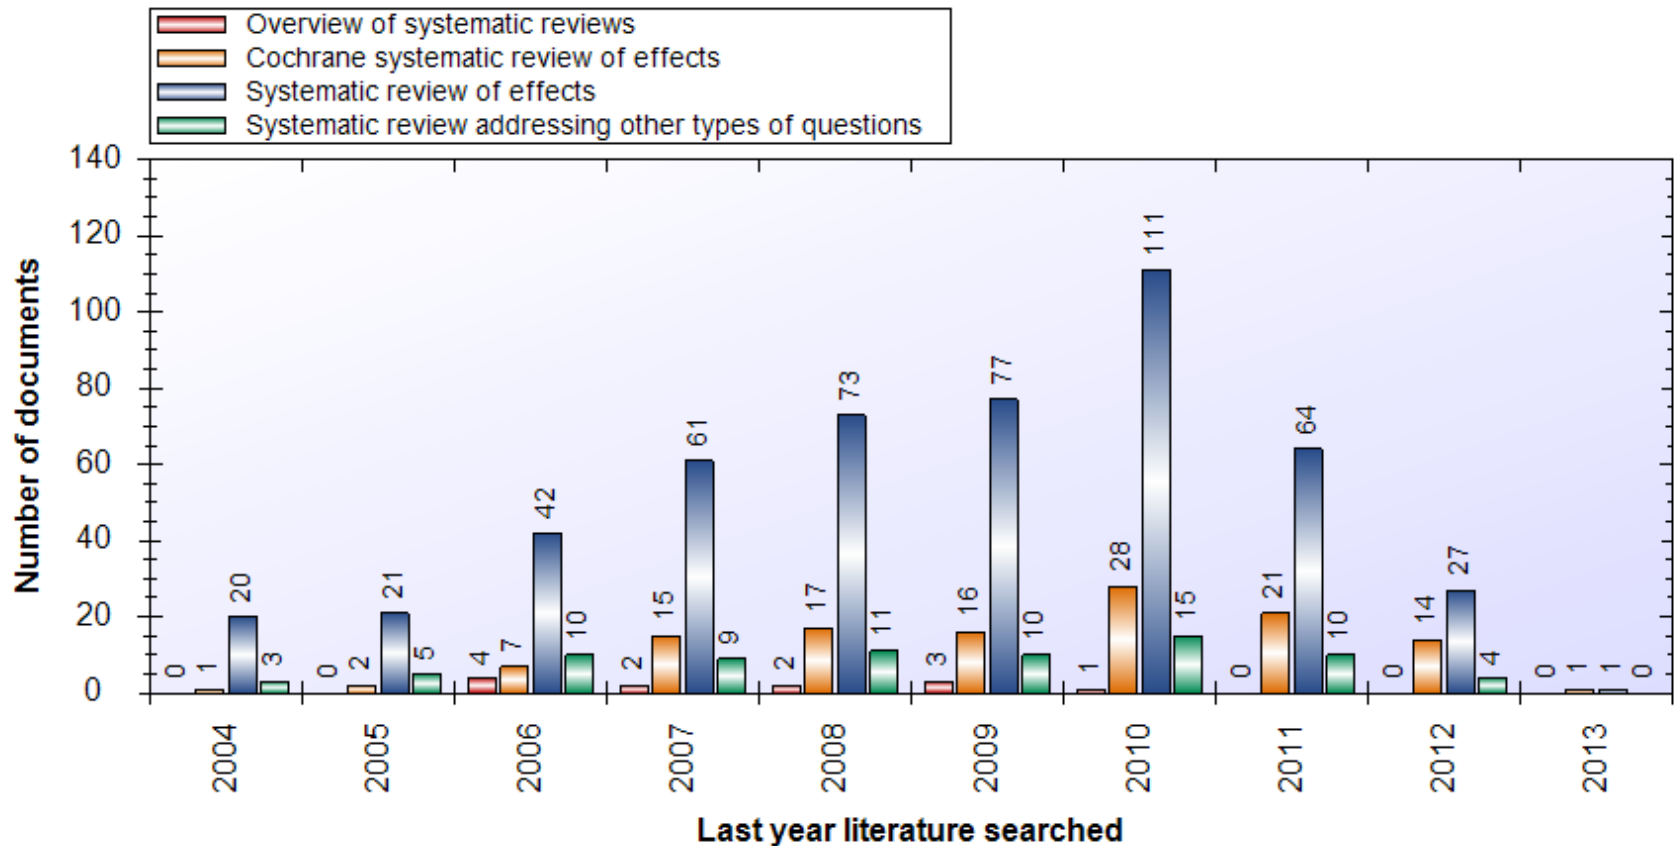

\*Of the 737 systematic reviews with an LMIC focus included in HSE, 78 do not report the last year the literature searched.
